# 1 Prognostic value of sTREM-1 in COVID-19 patients: a biomarker 2 for disease severity and mortality

3 Pedro V. da Silva Neto<sup>1,2\*</sup>, Jonatan C. S. de Carvalho<sup>1,3\*</sup>, Vinícius E. Pimentel<sup>1,4\*</sup>,  
4 Malena M. Pérez<sup>1\*</sup>, Ingrid Carmona-Garcia<sup>3,5\*</sup>, Nicola T. Neto<sup>5\*</sup>, Diana M.  
5 Toro<sup>1,2\*</sup>, Camilla N. S. Oliveira<sup>1,4\*</sup>, Thais F. C. Fraga-Silva<sup>4</sup>, Cristiane M. Milanezi<sup>4</sup>,  
6 Lilian C. Rodrigues<sup>1</sup>, Cassia F. S. L. Dias<sup>1</sup>, Ana C. Xavier<sup>5</sup>, Giovanna S. Porcel<sup>5</sup>,  
7 Isabelle C. Guarneri<sup>5</sup>, Kamila Zapparoli<sup>5</sup>, Caroline T. Garbato<sup>5</sup>, Jamille G. M.  
8 Argolo<sup>5</sup>, Ângelo A. F. Júnior<sup>5</sup>, Alessandro P. de Amorim<sup>10</sup>, Augusto M.  
9 Degiovani<sup>10</sup>, Dayane P. da Silva<sup>10</sup>, Debora C. Nepomuceno<sup>10</sup>, Rafael C. da  
10 Silva<sup>10</sup>, Leticia F. Constant<sup>10</sup>, Fátima M. Ostini<sup>10</sup>, Marley R. Feitosa<sup>6</sup>, Rogerio S.  
11 Parra<sup>6</sup>, Fernando C. Vilar<sup>7</sup>, Gilberto G. Gaspar<sup>7</sup>, José J. R. da Rocha<sup>6</sup>, Omar  
12 Feres<sup>6</sup>, Rita C. C. Barbieri<sup>11</sup>, Fabiani G. Frantz<sup>1</sup>, Sandra R. Maruyama<sup>8</sup>, Elisa M.  
13 S. Russo<sup>1</sup>, Angelina L. Viana<sup>5</sup>, Ana P. M. Fernandes<sup>5</sup>, Isabel K. F. M. Santos<sup>4</sup>,  
14 Vânia L. D. Bonato<sup>4</sup>, Marcelo Dias-Baruffi<sup>1</sup>, Adriana Malheiro<sup>2</sup>, Ruxana T.  
15 Sadikot<sup>9</sup>, Cristina R. B. Cardoso<sup>1#</sup>, Lúcia H. Faccioli<sup>1#</sup> and Carlos A. Sorgi<sup>2,3#</sup>.

16 <sup>1</sup>Departamento de Análises Clínicas, Toxicológicas e Bromatológicas. Faculdade de Ciências  
17 Farmacêuticas de Ribeirão Preto – FCFRP. Universidade de São Paulo – USP, Ribeirão Preto,  
18 SP, Brazil.

19 <sup>2</sup>Programa de Pós-Graduação em Imunologia Básica e Aplicada – PPGIBA. Instituto de Ciências  
20 Biológicas, Universidade Federal do Amazonas - UFAM, Manaus, AM, Brazil.

21 <sup>3</sup>Departamento de Química. Faculdade de Filosofia, Ciências e Letras de Ribeirão Preto –  
22 FFCLRP. Universidade de São Paulo - USP, Ribeirão Preto, SP, Brazil.

23 <sup>4</sup>Departamento de Bioquímica e Imunologia. Faculdade de Medicina de Ribeirão Preto - FMRP.  
24 Universidade de São Paulo – USP, Ribeirão Preto, SP, Brazil.

25 <sup>5</sup>Escola de Enfermagem de Ribeirão Preto – EERP. Universidade de São Paulo – USP, Ribeirão  
26 Preto, SP, Brazil.

27 <sup>6</sup>Departamento de Cirurgia e Anatomia, Faculdade de Medicina de Ribeirão Preto - FMRP,  
28 Universidade de São Paulo (USP), Ribeirão Preto, SP, Brazil.

29 <sup>7</sup>Departamento de Clínica Médica, Faculdade de Medicina de Ribeirão Preto - FMRP,  
30 Universidade de São Paulo (USP), Ribeirão Preto, SP, Brazil.

31 <sup>8</sup>Departamento de Genética e Evolução, Centro de Ciências Biológicas e da Saúde Universidade  
32 Federal de São Carlos - UFSCar, São Carlos, SP, Brazil.

33 <sup>9</sup>Department of Veterans Affairs, Division of Pulmonary and Critical Care Medicine, Emory  
34 University, Atlanta, USA.

35 <sup>10</sup>Hospital Santa Casa de Misericórdia de Ribeirão Preto, Ribeirão Preto, SP, Brazil.

36 <sup>11</sup>Hospital São Paulo, Ribeirão Preto, SP, Brazil.

37

38 \* These authors contributed equally to this work

39 # These authors contributed equally to this work

## 40 Corresponding:

41 Carlos Arterio Sorgi, Ph.D – Departamento de Química - FFCLRP – USP –  
42 Av. Bandeirantes, n.3900 – Ribeirão Preto / SP – 14040-901 – Brazil – Phone:  
43 (16) 3315 9176 - E-mail: [carlos.sorgi@usp.br](mailto:carlos.sorgi@usp.br)

## 44 **Abstract**

45 **Background:** The uncontrolled inflammatory response plays a critical role in the  
46 novel coronavirus disease (COVID-19) and triggering receptor expressed on  
47 myeloid cells-1 (TREM-1) is thought to be intricate to inflammatory signal  
48 amplification. This study aims to investigate the association between soluble  
49 TREM-1 (sTREM-1) and COVID-19 as a prognostic biomarker to predict the  
50 disease severity, lethality and clinical management. **Methods:** We enrolled 91  
51 patients with COVID-19 in domiciliary care (44 patients) or in hospital care (47  
52 patients), who were classified after admission into mild, moderate, severe and  
53 critical groups according to their clinical scores. As non-COVID-19 control, 30  
54 healthy volunteers were included. Data on demographic, comorbidities and  
55 baseline clinical characteristics were obtained from their medical and nurse  
56 records. Peripheral blood samples were collected at admission and after  
57 hospitalization outcome to assess cytokine profile and sTREM-1 level by specific  
58 immunoassays. **Results:** Within COVID-19 patients, the highest severity was  
59 associated with the most significant elevated plasma levels sTREM-1. Using  
60 receiver operating curve analysis (ROC), sTREM-1 was found to be predictive of  
61 disease severity (AUC= 0.988) and the best cut-off value for predicting in-hospital  
62 severity was  $\geq 116.5$  pg/mL with the sensitivity for 93.3% and specificity for  
63 95.8%. We also described the clinical characteristics of these patients and  
64 explored the correlation with markers of the disease aggravation. The levels of  
65 sTREM-1 were positively correlated with IL-6, IL-10, blood neutrophils counts,  
66 and critical disease scoring ( $r= 0.68$ ,  $p<0.0001$ ). On the other hand, sTREM-1  
67 level was significantly negative correlated with lymphocytes counting, and mild  
68 disease ( $r= -0.42$ ,  $p<0.0001$ ). Higher levels of sTREM-1 were related to poor  
69 outcome and death, patients who received dexamethasone tended to have lower  
70 sTREM-1 levels. **Conclusion:** Our results indicated that sTREM-1 in COVID-19  
71 is associated with severe disease development and a prognostic marker for  
72 mortality. The use of severity biomarkers such as sTREM-1 together with patients  
73 clinical scores could improve the early recognition and monitoring of COVID-19  
74 cases with higher risk of disease worsening. **Key words:** COVID-19; sTREM-1;  
75 Inflammation; Biomarker; Severity; Mortality.

76

## 77 Introduction

78 The new coronavirus disease (COVID-19), caused by severe acute  
79 respiratory syndrome coronavirus 2 (SARS-CoV-2), it became a worldwide public  
80 health problem due to high rates of morbidity and mortality. Approximately 80%  
81 of patients infected with SARS-CoV-2 may have mild symptoms or are  
82 asymptomatic. However, the virus is capable of causing serious clinical  
83 manifestations, such as acute respiratory distress syndrome (ARDS),  
84 cardiovascular and coagulopathy disorders and shock; resulting in multi-organ  
85 system dysfunction in some patients (1–10). Patients with older ages, male  
86 gender, obesity, and chronic comorbidities such as cardiovascular disease,  
87 diabetes, chronic respiratory disease, and cancer were more likely to have worse  
88 outcomes (11–13). Moreover, patients with COVID-19 present multiple  
89 hematological abnormalities, of which lymphopenia and thrombocytopenia were  
90 prominent (14).

91 Similar to SARS, inflammation plays a major role in the pathophysiology of  
92 COVID-19 and patients exhibiting severe disease may have systemic high  
93 concentrations of inflammatory makers in serum samples, such as IL-6, TNF- $\alpha$ ,  
94 C-reactive protein (CRP) and D-dimer (10,15–21). Pathogen infections generate  
95 an innate response that is initiated by the recognition of pathogen-associated  
96 molecular patterns (PAMPs) by pattern recognition receptors (PRRs) followed an  
97 antigen-specific adaptive immune response. Both innate and adaptive immune  
98 responses induce the activation of cell receptors and soluble mediators that  
99 trigger inflammation and its balance is critical for controlling tissue damage (22).  
100 Significant evidence indicates that a dysregulated immune and inflammatory  
101 response contributes to the clinical presentation of patients with severe COVID-  
102 19 disease.

103 Triggering receptor expressed on myeloid cells 1 (TREM-1) is a member of  
104 the immunoglobulin superfamily expressed in myeloid and epithelial cells. TREM-  
105 1 activation induces secretion of TNF- $\alpha$ , IL-6, IL-1 $\beta$ , IL-2, IL-12p40 by monocytes,  
106 macrophages and dendritic cells, enhancing inflammation during infections by  
107 different pathogens, namely Influenza A virus, Dengue virus, Hepatitis C virus,  
108 *Plasmodium falciparum*, *Staphylococcus aureus* and *Pseudomonas aeruginosa*  
109 (23–29). Immune responses against to virus and bacterial are modulated by

110 activation of TREM-1 in macrophages. TREM-1 KO mice are protected from  
111 severe influenza although viral clearance is unaltered (30). Similarly, HIV  
112 infection, or even exposure to the HIV proteins, Tat or gp120, in the absence of  
113 infection (31) induce expression of TREM-1 suggesting that TREM-1 may have  
114 a pathogenic role in viral infections and immune response.

115 Soluble form of the TREM-1 (sTREM-1) has been reported in plasma  
116 samples during infection and inflammation (32–35). The sTREM-1 is a 27kDa  
117 polypeptide in which the extracellular domain is released from the cell  
118 surface by action of metalloproteinases (36). Interestingly, the serum sTREM-1  
119 level measurements could be a valuable diagnostic biomarker and may be useful  
120 in predicting severe prognosis in diseases related to inflammatory processes, as  
121 seen in septic patients, Hepatitis B virus, Human Immunodeficiency virus (HIV),  
122 Crimean Congo Hemorrhagic Fever and *Mycobacterium tuberculosis infections*  
123 (27,33,37–39).

124 Given that SARS-CoV-2 infection induces a hyper-inflammatory response,  
125 we hypothesized that TREM-1 activation in the COVID-19 illness triggers  
126 upregulation and shedding into sTREM-1. Because, sTREM-1 has been  
127 validated as prognostic markers in various inflammatory disorders, we performed  
128 herein a prospective study to investigate the prognostic utility of sTREM-1 in  
129 patients with COVID-19, as an important biomarker that can predict disease  
130 severity and qualify effective interventions for managing patients that need  
131 intensive supportive care upon hospitalization.

## 132 MATERIAL AND METHODS

### 133 Study Design and subjects

134 This prospective study was conducted at *Hospital Santa Casa de Misericórdia of*  
135 *Ribeirão Preto* and *Hospital São Paulo of Ribeirão Preto - Brazil* from April to  
136 August of 2020 and was conducted with strict and reasonable inclusion and  
137 exclusion criteria. The patient inclusion criteria were adults (aged over 18 years),  
138 positive for SARS-CoV-2 infection that understood and agreed to enroll in this  
139 study. Controls (healthy adult volunteers) were tested negative for SARS-CoV-2.  
140 The exclusion criteria were individuals younger than 18 years of age and

141 pregnant or lactating women. In total, 30 control subjects were enrolled at the  
142 beginning of the COVID-19 pandemic with a negative test for SARS-CoV-2 and  
143 91 patients with a positive test for SARS-CoV-2, using genomic RNA assay  
144 performed in a nasopharyngeal/oropharyngeal swab RT-PCR (Kit Biomol  
145 OneStep/COVID-19) or serology specific IgM and IgG antibodies (SARS-CoV-2  
146 antibody test<sup>®</sup>, Guangzhou Wondfo Biotech, China).

## 147 **Data collection**

148 Members of our team carefully collected and reviewed the medical records of  
149 each patient. The data were searched and compiled from the electronic medical  
150 and nursing record systems. We included sociodemographic information,  
151 comorbidities, medical history, clinical symptoms, routine laboratory tests,  
152 immunological tests, chest computed tomography (CT) scans results, clinical  
153 interventions, and outcomes. These informations were documented on a  
154 standardized record form. Data collection of laboratory results was defined using  
155 the first-time examination at admission (within 24 h after admission), defined as  
156 primary endpoint, and the secondary endpoint was clinical outcome (death or  
157 recovery).

## 158 **Severity assessment**

159 Clinically, severity of the COVID-19 patients was classified into mild, moderate,  
160 severe, and critical ill according to the statement in the Novel Coronavirus  
161 Pneumonia Diagnosis and Treatment Guideline (7th ed.), with modifications (40).  
162 The clinical manifestations were categorized as: i) mild group - positive for SARS-  
163 CoV-2 infection, with or without the following symptoms: diarrhea, cough, fever,  
164 headache, loss of taste (ageusia)/ smell (anosmia), myalgia, nausea, and  
165 vomiting, oxygen saturation between 94-99 % on room air; ii) moderate group -  
166 patients having manifestation of mild disease, with symptoms including dyspnea,  
167 oxygen saturation  $\geq 93\%$  on room air and arterial partial pressure of oxygen  
168 ( $\text{PaO}_2$ )/ oxygen concentration ( $\text{FiO}_2$ ) between 250-300 mmHg, do not need  
169 invasive ventilation, allegedly using nasal-cannula oxygen (2-4 L/min) or oxygen  
170 masks ventilation (4-12 L/min); iii) severe group - possible admission to intensive-

171 care units, severe respiratory distress, oxygen saturation < 93% on room air and  
172 PaO<sub>2</sub>/ FiO<sub>2</sub> < 250mmHg, need non-invasive ventilation, such as oxygen masks  
173 ventilation (10-15 L/min); and iv) critical group - admission to intensive-care units,  
174 acute respiratory distress syndrome, need invasive ventilation, PaO<sub>2</sub>/ FiO<sub>2</sub>  
175 <200mmHg, with or without one or more additional parameters: need  
176 hemodialysis, sepsis, septic shock, and multiorgan dysfunction (41).

## 177 **Laboratory Methods**

178 Blood samples were collected by venipuncture in tubes with vacuum collection  
179 system. Two tubes (5mL capacity) were collected from each patient: one tube  
180 containing EDTA anticoagulant (BD Vacutainer® EDTA K2 Franklin Lakes, New  
181 Jersey, USA) to perform hematological tests, and a tube containing heparin  
182 anticoagulant (BD SST® Gel Advance® Franklin Lakes, New Jersey, USA) to  
183 obtain plasma used to quantify levels of circulating protein mediators by flow  
184 cytometry or ELISA assay. Plasma was separated from whole blood samples and  
185 stored in a -80°C freezer. The clinical laboratory investigation included a complete  
186 blood count and biochemical serum tests (including liver and kidney function), as  
187 well as the determination of the coagulation factors and myocardial enzyme  
188 spectrum.

## 189 **Cytokines measurement**

190 The cytokines IL-6 and IL-10 were quantified by the Cytometric Bead Array  
191 technique, according to the manufacturer's specifications (BD™ Human  
192 Inflammatory Cytokine CBA Kit, Catalog No. 551811, Lot: 9341655). Briefly, 50µl  
193 of plasma samples were mixed with capture antibody-coupled beads, and then  
194 50µl fluorescent labeled (PE) detection antibodies. The samples were mixed and  
195 incubated at room temperature in the dark. After 3 h incubation, the beads were  
196 washed and resuspended with PBS 1% paraformaldehyde (*v/m* – Sigma  
197 Chemical Co. St. Louis, MO – USA). A recombinant protein standard for each  
198 cytokine that provides an internal control was included. The detection range of  
199 each cytokine was 2.5 pg/ml to 5000 pg/ml. Data acquisition was performed using  
200 a FACSCanto II flow cytometer (FACS Canto™II – BD Biosciences, San Diego,



201 CA, USA). Data was analyzed using FCAP Array 3.0 software and expressed as  
202 mean fluorescence intensity (MIF) for each serum cytokine (BD Biosciences, San  
203 Diego, CA, USA).

#### 204 **Serum sTREM-1 assay**

205 Circulating level of sTREM-1 were measured in plasma by an established  
206 available enzyme linked immunosorbent assay kit (DuoSet- Human TREM-1,  
207 R&D System, Minneapolis, USA), with a detection range of 93.8 – 6,000 pg/mL.  
208 The methodology was in according to the protocol described by the manufacturer  
209 (R&D Systems, Minneapolis, MN).

#### 210 **Computation of Correlation Matrix**

211 The dependence of multiple variables: sTREM-1 release (pg/mL); oxygen  
212 saturation (sO<sub>2</sub> %); age (years); neutrophil count (x 10<sup>9</sup> cells/L); lymphocytes  
213 count (x 10<sup>9</sup> cells/L); hypertension (systole); glycemia (mg/dL); male gender;  
214 clinical scores (mild, moderate, severe and critical); IL-6 (pg/mL) and IL-10  
215 amount (pg/mL); was calculated using Pearson correlation with cor() function in  
216 R (version 4.0.2) through RStudio (version 1.1.463). The computed correlation  
217 matrix was graphically displayed using corrplot function from R package “corrplot”  
218 (Version 0.84) (42). Correlation coefficients (r) and *p*-values of the correlation  
219 matrix were formatted and tabulated using Hmisc R package (43) and the values  
220 available at Supplemental Table S2.

#### 221 **Statistical analysis**

222 Data is presented as either counts or percentages (%) (for categorical) or median  
223 (IQR) and standard deviations (SD) for continuous data. Intergroup comparisons  
224 were made by the Mann-Whitney *U* test (non-normally distributed continuous  
225 variables) and chi-square test or Fischer’s exact test for categorical variables.  
226 One-way analysis of variance nonparametric test (Kruskal–Wallis test) was used  
227 for multiple comparisons. The accuracy of predictor was determined by area  
228 under the receiver operating characteristic (ROC) curve (AUC). The AUCs, with  
229 95% confidence intervals, were computed to assess the diagnostic values of

230 sTREM-1; AUCs > 0.70 were considered clinically relevant. Comparative analysis  
231 between groups was performed using GraphPad Prism™ software (version 8.4.2)  
232 (San Diego, CA, USA). Statistical test differences were considered significant if  
233 the *p* values were < 0.05.

## 234 **Ethical approval**

235 The procedures followed in this study were approved by the institutional ethics  
236 board of *Faculdade de Ciências Farmacêuticas de Ribeirão Preto – Universidade*  
237 *de São Paulo* and Brazil National Ethics Committee (CONEP, CAAE:  
238 30525920.7.000.5403). Written informed consent was obtained from recruited  
239 participants of the study.

## 240 **RESULTS**

### 241 *Demographic data, initial clinical signs and laboratory characteristics of study* 242 *subjects*

243 In total, 91 patients with laboratory-confirmed COVID-19 and 30 healthy  
244 volunteers were recruited to the study (Table 1). In this study population, 44  
245 patients were diagnosed with mild disease with residential care and 47 patients  
246 with severe disease with hospital care on admission. The median age was 32.0  
247 years (range, 23–80) for healthy volunteers and 49.0 years (range, 18–94) for all  
248 patients infected with SARS-CoV-2. The average age was significantly higher in  
249 the hospitalized patients than in residential care patients (Table 1). There was  
250 significant difference in the female ratio between the healthy control group and  
251 hospitalized COVID-19 patients (Table 1). Most patients had comorbidities or  
252 coexisting disorders, including hypertension (29.6%), heart disease (10.9%),  
253 diabetes (18.6%), neurological disorders (6.5%), cancer (5.4%), history of  
254 smoking (19.7%), and history of stroke (3.2%). The number of comorbidities was  
255 significantly higher in COVID-19 patients than in control group or in hospitalized  
256 patients compared to residential care subjects (Table 1).

257 Generally, the most common initial symptoms in COVID-19 patients were  
258 cough (62.6%), dyspnea (47.2%) and dysgeusia (35.1%), followed by diarrhea,  
259 fever, muscle soreness, and hyperactive delirium (Table 1). In addition, the  
260 absolute number of erythrocytes, hemoglobin, neutrophils, lymphocytes and



261 monocytes in the COVID-19 patients group were significant different than that in  
 262 the control group, while the glycemic level was significant difference between the  
 263 residential care and hospital care groups (Figure 1). The median time of  
 264 hospitalization for COVID-19 patients was 10 days and some patients needed  
 265 intensive care (42.5%). Also, those hospitalized patients received respiratory  
 266 support: nasal-cannula oxygen (48.9%), oxygen masks ventilation (27,6%) and  
 267 invasive mechanical ventilation (23.4%). The oxygen saturation was significantly  
 268 lower in the hospitalized patients than in residential care patients (Table 1). The  
 269 most common pharmacological treatments for COVID-19 patients were  
 270 azithromycin (56.0%), dexamethasone (45.0%), ceftriaxone (41.7%), oseltamivir  
 271 (37.3%), followed by cloroquine/hydroxychloroquine, ivermectin and  
 272 anticoagulant.

273 **Table 1. Demographics and clinical characteristics of patients infected with**  
 274 **SARS-CoV-2.**

| Baseline Variable                                             | Healthy Controls<br>N= 30    | All patients<br>N= 91        | COVID-19 care                |                              | P Value                                        |
|---------------------------------------------------------------|------------------------------|------------------------------|------------------------------|------------------------------|------------------------------------------------|
|                                                               |                              |                              | Residential<br>N=44          | Hospital<br>N=47             |                                                |
| <b>Demographic characteristics</b>                            |                              |                              |                              |                              |                                                |
| Age median $\pm$ SD, (IQR)                                    | 32.0 $\pm$ 14.1<br>(23-80)   | 49.0 $\pm$ 19.7<br>(18-94)   | 37.0 $\pm$ 10.7<br>(18-59)   | 66.0 $\pm$ 16.0<br>(30-94)   | <sup>a</sup> 0.0002<br><sup>b,c</sup> < 0.0001 |
| <b>Gender, No. (%)</b>                                        |                              |                              |                              |                              |                                                |
| Male                                                          | 17 (56.6)                    | 46 (50.2)                    | 15 (34.0)                    | 31 (65.9)                    | <sup>a</sup> 0.6744                            |
| Female                                                        | 13 (43.3)                    | 45 (49.4)                    | 29 (65.9)                    | 16 (34.0)                    | <sup>c</sup> 0.0033                            |
| <b>Comorbidities or coexisting disorders, No. (%)</b>         |                              |                              |                              |                              |                                                |
| Hypertension                                                  | 4 (13.3)                     | 27 (29.6)                    | 2 (4.5)                      | 25 (53.1)                    | <sup>a</sup> 0.0934<br><sup>c</sup> < 0.0001   |
| Cardiovascular disease                                        | 3 (10.0)                     | 10 (10.9)                    | 5 (11.3)                     | 5 (10.6)                     | <sup>a</sup> 1.0000<br><sup>c</sup> 1.0000     |
| Diabetes mellitus                                             | 1 (3.3)                      | 17 (18.6)                    | 4 (9.0)                      | 13 (27.6)                    | <sup>a</sup> 0.0419<br><sup>c</sup> 0.0311     |
| History of smoking                                            | 7 (23.3)                     | 18 (19.7)                    | 4 (9.0)                      | 14 (29.7)                    | <sup>a</sup> 0.7952<br><sup>c</sup> 0.0175     |
| History of stroke                                             | -                            | 3 (3.2)                      | -                            | 3 (6.3)                      | -                                              |
| Neurological                                                  | -                            | 6 (6.5)                      | 2 (4.5)                      | 4 (4.8)                      | <sup>c</sup> 0.6778                            |
| Cancer                                                        | -                            | 5 (5.4)                      | -                            | 5 (10.6)                     | -                                              |
| <b>Presenting symptoms, No. (%)</b>                           |                              |                              |                              |                              |                                                |
| Dyspnea                                                       | -                            | 43 (47.2)                    | 16 (36.3)                    | 27 (57.4)                    | <sup>c</sup> 0.1983                            |
| Fever                                                         | -                            | 18 (19.7)                    | 1 (2.2)                      | 17 (36.1)                    | <sup>c</sup> < 0.0001                          |
| Myalgia                                                       | -                            | 11 (12.0)                    | -                            | 11 (23.4)                    | -                                              |
| Diarrehea                                                     | -                            | 28 (30.7)                    | 18 (40.9)                    | 10 (21.2)                    | <sup>c</sup> 0.0681                            |
| Cough                                                         | -                            | 57 (62.6)                    | 32 (72.7)                    | 25 (53.1)                    | <sup>c</sup> 0.0822                            |
| Hyperactive Delirium                                          | -                            | 3 (3.2)                      | -                            | 3 (6.3)                      | -                                              |
| Dysgeusia                                                     | -                            | 32 (35.1)                    | 28 (63.6)                    | 4 (8.5)                      | <sup>c</sup> < 0.0001                          |
| <b>Laboratory findings, median <math>\pm</math> SD, (IQR)</b> |                              |                              |                              |                              |                                                |
| Erythrocytes x 10 <sup>12</sup> /L                            | 5.0 $\pm$ 0.5<br>(4.00-5.90) | 4.5 $\pm$ 0.8<br>(2.23-5.89) | 4.8 $\pm$ 0.4<br>(3.77-5.89) | 3.9 $\pm$ 0.8<br>(2.23-5.67) | <sup>a</sup> 0.0011<br><sup>b</sup> < 0.0001   |

|                                         |                                |                              |                               |                               |                                                              |
|-----------------------------------------|--------------------------------|------------------------------|-------------------------------|-------------------------------|--------------------------------------------------------------|
| Hemoglobin (g/dL)                       | 15.1 ± 1.5<br>(11.30-17.50)    | 13.7 ± 2.6<br>(6.60-18.20)   | 14.6 ± 1.2<br>(12.70-18.20)   | 11.8 ± 2.6<br>(6.60-16.20)    | <sup>a</sup> <b>0.0006</b><br><sup>b</sup> < <b>0.0001</b>   |
| Leukocytes x 10 <sup>9</sup> /L         | 7.6 ± 2.1<br>(4.10-13.44)      | 8.1 ± 4.5<br>(1.60-26.10)    | 7.7 ± 2.4<br>(3.24-13.58)     | 9.0 ± 5.6<br>(1.60-26.10)     | <sup>a</sup> 0.5548<br><sup>b</sup> 0.1342                   |
| Neutrophils x 10 <sup>9</sup> /L        | 57.4 ± 8.3<br>(36.00-74.60)    | 68.1 ± 16.0<br>(32.30-93.00) | 57.2 ± 10.3<br>(32.30-77.80)  | 82.0 ± 8.2<br>(56.10-93.00)   | <sup>a</sup> <b>0.0001</b><br><sup>b</sup> < <b>0.0001</b>   |
| Lymphocytes x 10 <sup>9</sup> /L        | 32.1 ± 8.3<br>(11.80-48.40)    | 20.5 ± 14.2<br>(1.00-58.00)  | 33.1 ± 9.3<br>(18.10-58.00)   | 9.7 ± 6.2<br>(1.00-31.80)     | <sup>a</sup> <b>0.0004</b><br><sup>b</sup> < <b>0.0001</b>   |
| Monocytes x 10 <sup>9</sup> /L          | 7.2 ± 2.0<br>(3.80-13.00)      | 6.1 ± 2.9<br>(0.0-12.90)     | 7.0 ± 1.9<br>(3.20-11.20)     | 5.0 ± 3.3<br>(0.0-12.90)      | <sup>a</sup> <b>0.0054</b><br><sup>b</sup> <b>0.0001</b>     |
| Platelets x 10 <sup>9</sup> /L          | 219.5 ± 39.67<br>(129.0-297.0) | 222.0 ± 96.2<br>(9.10-620.0) | 231.9 ± 61.0<br>(119.0-365.0) | 242.6 ± 121.7<br>(9.10-620.0) | <sup>a</sup> 0.6639<br><sup>b</sup> 0.8674                   |
| Glycemia (mg/dL)                        | 94.5 ± 43.74<br>(76.00-244.0)  | 99.0 ± 80.8<br>(9.0-479.0)   | 89.0 ± 69.1<br>(65.00-479.0)  | 115.5 ± 89.0<br>(9.0-467.0)   | <sup>a</sup> 0.9968<br><sup>c</sup> <b>0.0035</b>            |
| <b>Hospital support, No. (%)</b>        |                                |                              |                               |                               |                                                              |
| Infirmary                               | -                              | 27 (29.6)                    | -                             | 27 (57.4)                     | -                                                            |
| Intensive care unit (ICU)               | -                              | 20 (21.9)                    | -                             | 20 (42.5)                     | -                                                            |
| <b>Hospitalization data, No.</b>        |                                |                              |                               |                               |                                                              |
| Hospitalization days, median(IQR)       | -                              | 10 (1-34)                    | -                             | 10 (1-34)                     | -                                                            |
| <b>Respiratory support received (%)</b> |                                |                              |                               |                               |                                                              |
| Nasal-cannula oxygen                    | -                              | 23 (25.2)                    | -                             | 23 (48.9)                     | -                                                            |
| Oxygen masks/ Noninvasive               | -                              | 13 (14.2)                    | -                             | 13 (27.6)                     | -                                                            |
| Invasive mechanical ventilation         | -                              | 11 (12.0)                    | -                             | 11 (23.4)                     | -                                                            |
| Oxygen Saturation median ± SD (IQR)     | 97 ± 1.7<br>(92-99)            | 92 ± 9.2<br>(54-99)          | 97 ± 2.3<br>(90-99)           | 86 ± 11.0<br>(54-99)          | <sup>a</sup> <b>0.0015</b><br><sup>b,c</sup> < <b>0.0001</b> |
| <b>Medications No. (%)</b>              |                                |                              |                               |                               |                                                              |
| Dexamethasone                           | -                              | 41 (45.0)                    | 5 (11.3)                      | 36 (76.5)                     | <sup>c</sup> < <b>0.0001</b>                                 |
| Azithromycin                            | -                              | 51 (56.0)                    | 13 (29.5)                     | 38 (80.8)                     | <sup>c</sup> < <b>0.0001</b>                                 |
| Ceftriaxone                             | -                              | 38 (41.7)                    | -                             | 38 (80.8)                     | -                                                            |
| Oseltamivir                             | -                              | 34 (37.3)                    | 5 (11.3)                      | 29 (61.7)                     | <sup>c</sup> < <b>0.0001</b>                                 |
| Cloroquine/Hydroxychloroquine           | -                              | 12 (13.1)                    | -                             | 12 (25.5)                     | -                                                            |
| Anticoagulant                           | -                              | 3 (3.2)                      | -                             | 3 (6.3)                       | -                                                            |
| Ivermectin                              | -                              | 7 (7.6)                      | 7 (15.9)                      | -                             | -                                                            |

275 Abbreviation: SD: Standard deviation; Data are median (IQR), n (%), or n/N. <sup>a</sup>Comparing the healthy  
 276 controls group with all patients; <sup>b</sup>Comparing the healthy controls group with residential and hospital  
 277 COVID-19 patients, <sup>c</sup>Comparing the residential group with hospitalized subjects. Patients' data were  
 278 compared using  $\chi^2$  test, or Fisher's exact test for categorical variables and one-way analysis of  
 279 variance (ANOVA) Mann-Whitney, nonparametric *t*-test application was used for continuous variables.  
 280  $p < 0.05$  was considered statistically significant.

### 281 *sTREM-1 release is significantly associated with disease severity*

282 The potential role of sTREM-1 in regulating infectious diseases has been  
 283 extensively investigated elsewhere. Here, we compared the levels of sTREM-1  
 284 in plasma samples from control group and COVID-19 patients, and also,  
 285 assessed the correlation with severity illness. As shown in Figure 1A, sTREM-1  
 286 values were higher in patients with COVID-19 and significantly different in  
 287 hospitalized group when compared with healthy volunteer controls, indicating an  
 288 activation of immune response against SARS-CoV-2 infection. To evaluate the  
 289 prognostic value of sTREM-1 in patients with COVID-19, ROC curves were drawn  
 290 for patients with COVID-19 in residential and hospital care versus healthy  
 291 controls.

292           The area under ROC curve of sTREM-1 for residential care patients, which  
293 represent mostly the mild disease, was proximal to the considered value for  
294 clinical relevance (AUC= 0.691); the preoperative concentration of  $\geq 69.5$  pg/mL  
295 was the optimal cutoff value for predicting COVID-19 (sensitivity = 71.43 (54.9–  
296 83.6)%, specificity = 54.1%); the positive predictive values (PPV) of 91.6 (60.2–  
297 98.7)% and the negative predictive values (NPV) of 48.9 (43.0–54.9)% were  
298 described (Figure 1B). However, the area under ROC curve of sTREM-1 for  
299 hospital care patients, which denote the severe disease, was higher for clinical  
300 relevance (AUC= 0.988); the sTREM-1 cut-off value of  $\geq 116.5$  pg/mL yielded  
301 sensitivity of 93.3 (82.1–97.7)%, specificity of 95.83%, the PPV of 97.5 (85.4–  
302 99.6)%, and the NPV of 82.1 (66.7–91.4)% for differentiating patients with  
303 COVID-19 from those healthy subjects (Figure 1B). The plotted relative frequency  
304 of patients to sTREM-1 production, showed a high number of events for low level  
305 of sTREM-1 in residential care patients (mean = 113.68 pg/mL), and a spreader  
306 number of events for high levels of sTREM-1 in hospital care patients (mean =  
307 325.18 pg/mL), considering a intersection phase between residential and  
308 hospitalized patients with COVID-19 (Figure 1C). Those results indicated the  
309 sTREM-1 as a potential marker predictive of COVID-19 severity illness.

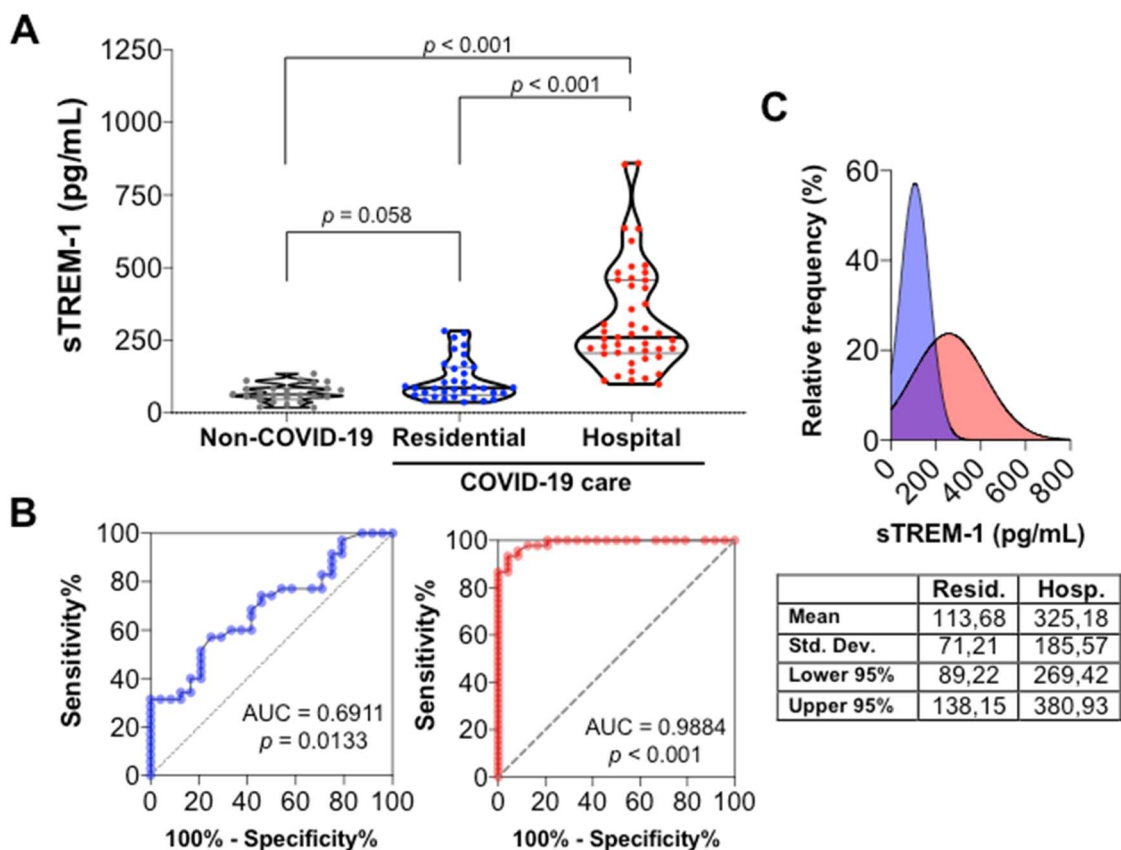

310

311 **Figure 1. The values of sTREM-1 in COVID-19 patients are elevated.** (A) The plasma  
 312 concentration of sTREM-1 from COVID-19 patients with residential (n=44); or hospital  
 313 care (n=47); and healthy controls (n=30) were analyzed and compared with each other. Median with  
 314 range was presented. One-way analysis of variance nonparametric test (Kruskal–Wallis test) was  
 315 used for multiple comparisons when data were not normally distributed. The differences between  
 316 each group were presented with a  $p$  value in the graphic above the diagram. (B) ROC curves  
 317 sTREM-1 for predicting disease on residential care (blue) and hospital care (red) patients with  
 318 COVID-19. The area under the curve (AUC) and the comparative  $p$  value between COVID-19  
 319 patients and control group was designated in the graphic. (C) Relative frequency of residential  
 320 care (blue) and hospital care (red) on sTREM-1 release in COVID-19 patients. The mean,  
 321 standard deviation, CL lower 95% and CL upper 95% data of each group were presented in the  
 322 table under the diagram.

323 *Correlation of sTREM-1 with disease severity, comorbidities and inflammatory*  
 324 *mediators in COVID-19 patients*

325 Subgroup analysis correlation of sTREM-1 in adverse outcome prediction  
 326 was performed for patients according to different disease severity on admission.  
 327 In this case, oxygen saturation (sO<sub>2</sub>), age, neutrophil count, lymphocytes count,  
 328 hypertension, glycemia, male gender, clinical scores, IL-6 and IL-10 were  
 329 identified as independent risk factors of adverse outcome in patients with COVID-  
 330 19. For this, we performed analyses using the level of sTREM-1 in 91 patients'

331 plasma obtained during the period of SARS-CoV-2 infection diagnostic  
332 confirmation. In figure 2A, a correlation plot using correlation matrix ( $r$  values)  
333 showed statistically positively association of sTREM-1 level with critical disease,  
334 neutrophils count, age, and IL-10, IL-6 production. Conversely, we also observed  
335 a statistically negative association of sTREM-1 with mild disease and  
336 lymphocytes count. Full  $r$  and  $p$ -values of the correlation matrix are available in  
337 Supplemental Table S2. To further examine if higher sTREM-1 contributes to  
338 disease severity, we next analyzed sTREM-1 level in COVID-19 patients  
339 subgroups based on disease severity (Figure 2B). Despite significant differences  
340 between critical and severe or moderate and to mild groups, such significance  
341 was not seen for comparison between moderate and mild patients.

342 As expected, in figure 2C we demonstrated a positive correlation between  
343 sTREM-1 and neutrophils count, IL-10 and IL-6 levels. However, when comparing  
344 these independent risk factors with the adverse outcome in patients with COVID-  
345 19, we observed a homogeneity values for mild and moderate disease (Gate 1),  
346 and variable increased levels for severe (Gate 2) and critical disease (Gate 3).  
347 On this way, we suggested that sTREM-1 value is a better predictor of clinical  
348 outcome of the disease than other risk factors or inflammatory mediators. In  
349 addition, sTREM-1 negatively correlated with lymphocyte count; and as  
350 assumed, sTREM-1 levels improved the discrimination between the  
351 mild/moderate to severe and critical group when compared to total lymphocytes  
352 number. Interesting, we observed that the glycemia index was higher in severe  
353 group than in mild/moderate and critical group, indicating that a single analysis of  
354 glycemia cannot be used to classify adequately all the COVID-19 severity  
355 ranges.

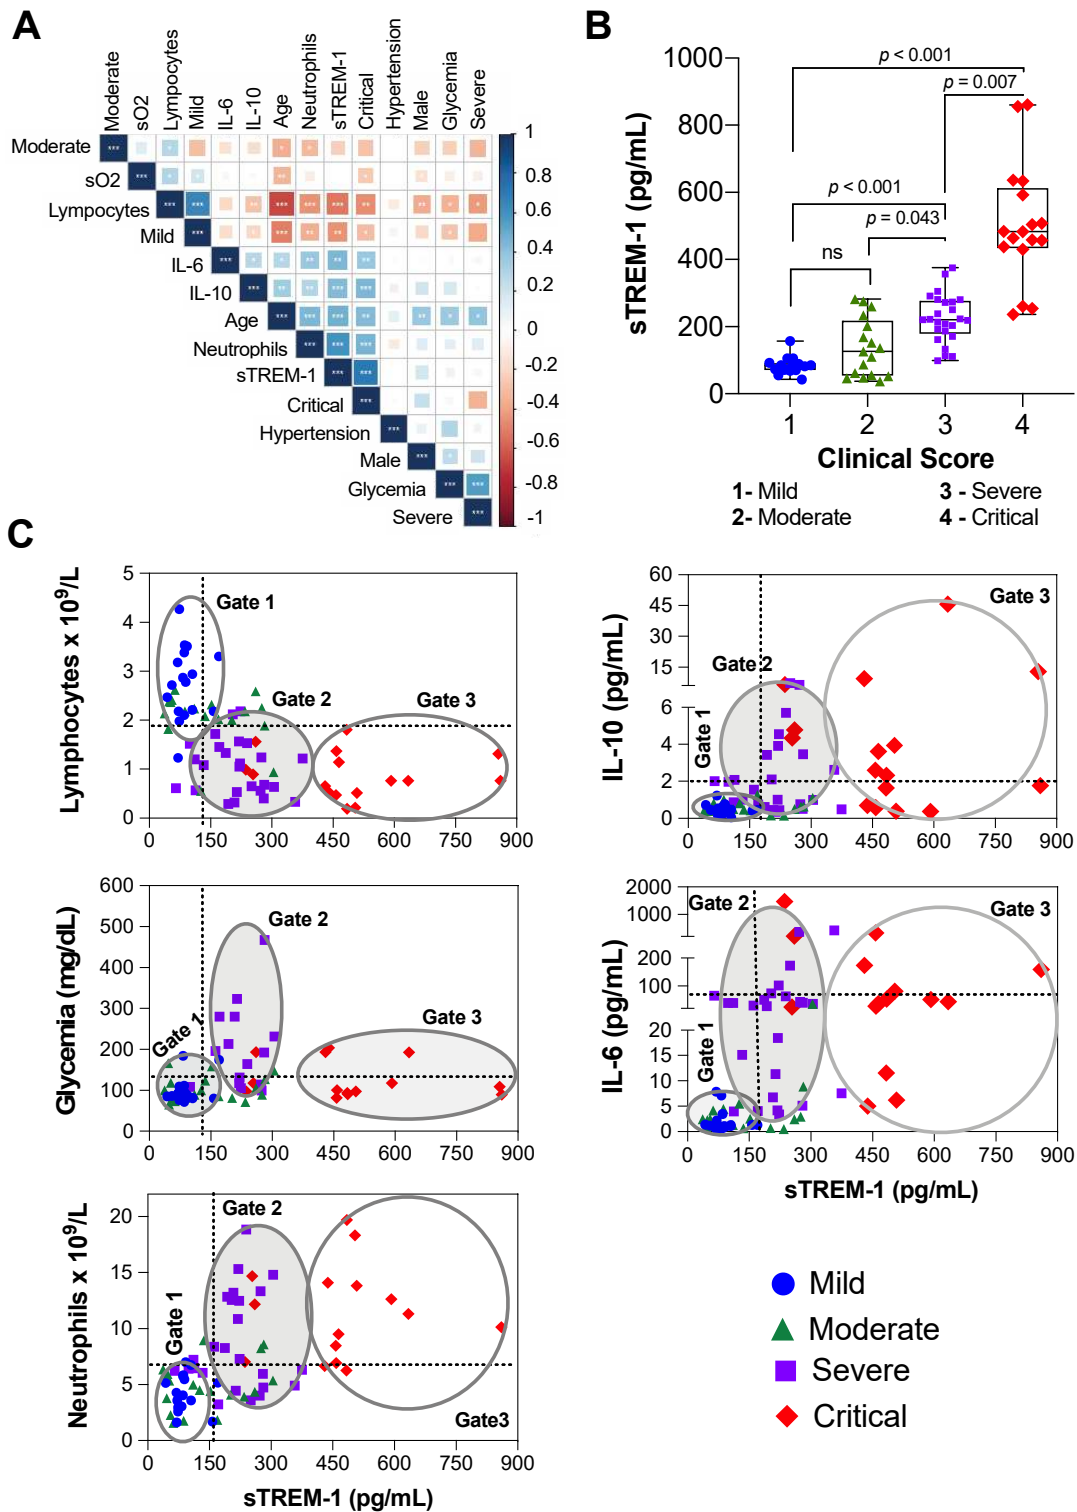

356

357 **Figure 2. Clinical and immunological parameters strictly correlated with sTREM-1 levels in**  
 358 **COVID-19 patients. (A)** Correllogram of sTREM-1 and cytokine levels in the plasma of COVID-  
 359 19 patients with comorbidities and clinical characteristics. Color scale sidebar indicates the  
 360 correlation coefficients (r), where blue means positive correlation and red means negative  
 361 correlation. Square size and color intensity are proportional to the correlation coefficients.  
 362 Statistically significant correlations of pairwise variable comparisons are indicated by \*p < 0.05,  
 363 \*\*p < 0.01 and \*\*\*p < 0.001. **(B)** The level of sTREM-1 in COVID-19 patients with different severity:  
 364 mild (n = 23), moderate (n = 21), severe (n = 28) and critical (n = 19) group. Median with ranges



365 was presented. One-way analysis of variance nonparametric test (Kruskal–Wallis test) was used  
366 for multiple comparisons when data were not normally distributed. The differences between each  
367 group were presented with a  $p$  value in the graphic above the diagram. (C) The correlation of  
368 plasma sTREM-1 and lymphocytes count, glycemia, neutrophils count, IL-10 and IL-6 amount in  
369 patients with COVID-19 was represented by a dot-plot graphic. The lines indicated the median  
370 value of different variables of all patients. Gates are placed around populations with common  
371 characteristics of patients with COVID-19.

### 372 *Added Prognostic Value of sTREM-1 to predict mortality risk in COVID-19*

373 To perform longitudinal analysis, sTREM-1 in patients with COVID-19 was  
374 further monitored during hospitalization. To better view the overall changes of  
375 sTREM-1 level, the plasma concentrations in the admission (baseline level) and  
376 after in the outcome treatment (death or recovery) were compared (Figure 3A).  
377 Of note, mostly patients treated with dexamethasone showed a reduced or  
378 stabilized sTREM-1 release after treatment, with only two-outcome recovery  
379 patient. In contrast, plasma sTREM-1 was significantly elevated in patients with  
380 COVID-19 who were not treated with dexamethasone. Notably, no recovery  
381 outcome was observed in these subjects and thus this analysis showed that  
382 sTREM-1 was a significant predictor of mortality.

383 In figure 3B, we showed our cohort of COVID-19 hospital pharmacological  
384 therapies. Although there are no approved treatments for COVID-19, the hospital  
385 protocols issued for antibiotics, antivirals and anti-inflammatory drugs. While  
386 treatment in this study was not stratified by severity of disease, 14 hospitalized  
387 patients in this cohort longitudinal analysis have been treated with  
388 dexamethasone (73.68%); 14 patients with antibiotics (azithromycin/ceftriaxone  
389 73.68%), 12 patients with oseltamivir (63.15%), 5 patients with  
390 hydroxycloquine/cloroquine (26.3%) and 1 patient treated with anticoagulant  
391 (5.2%). The combined pharmacology approach for these patients with COVID-19  
392 was represented by a Venn diagram (Figure 3B). Changes in oxygen support  
393 level from hospital admission to recovery or death were showed in Figure 3C. In  
394 our cohort, 9 patients were in hospital infirmary care (47.3%) and 10 patients  
395 were in intensive care unit (52.63%). Among those patients, 6 were on invasive  
396 mechanical ventilation (31.5%), 8 on oxygen masks non-invasive ventilation  
397 (42.1%) and 5 on oxygen nasal-cannula (26.3%) during hospitalization. The

398 details of hospital support and supportive therapies for patients with COVID-19  
 399 were demonstrated in Supplemental Table 1.

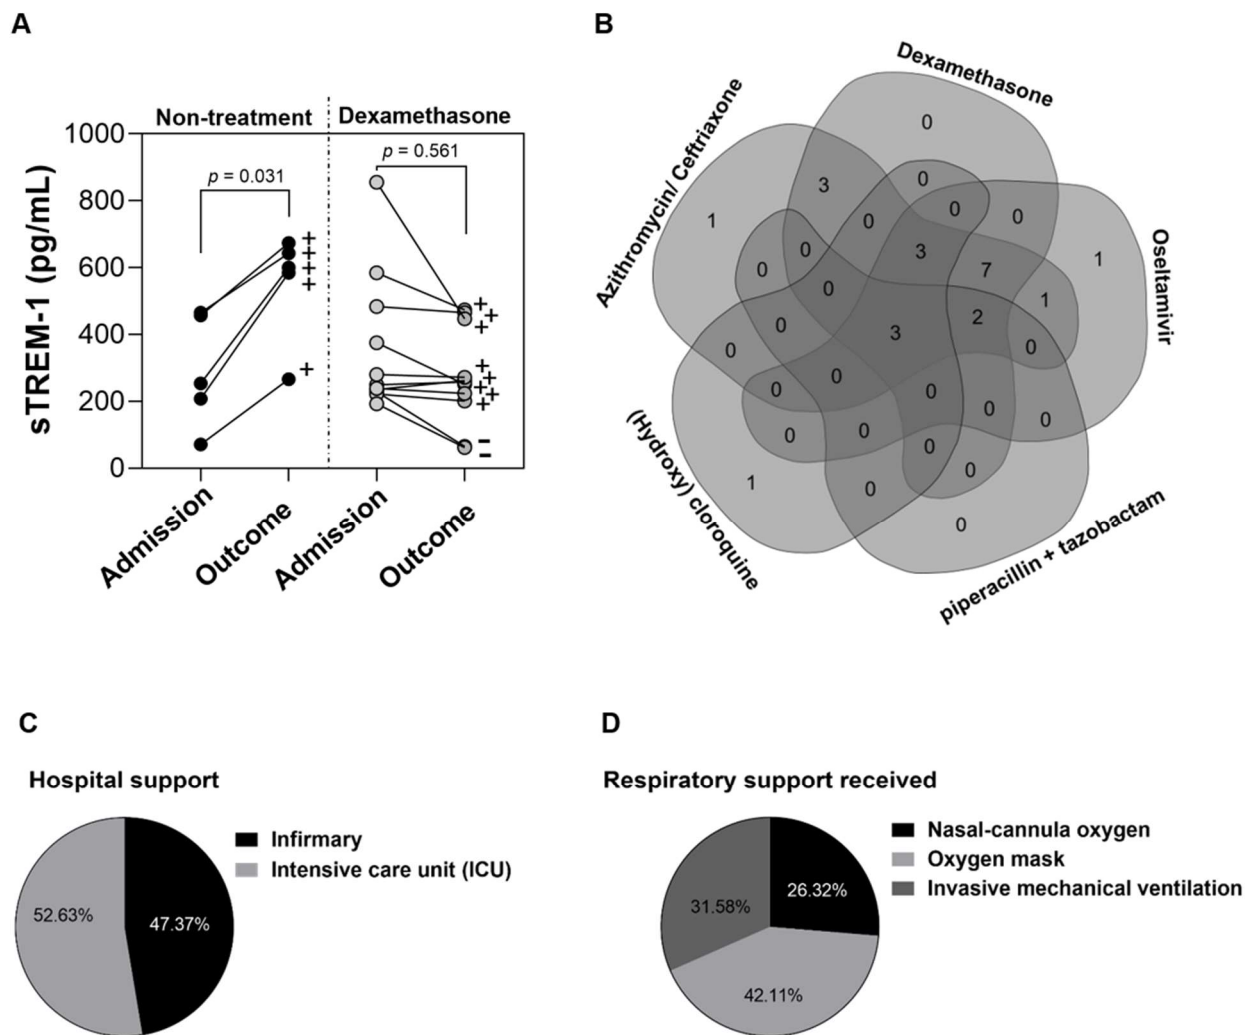

400  
 401 **Figure 3. The kinetics of sTREM-1 in COVID-19 patients during hospitalization.** (A) The plasma  
 402 sTREM-1 level of critical patients during hospitalization was presented. The graphics indicated the  
 403 individually value of sTREM-1 in the day of hospital-admission and after in the disease outcome, that can  
 404 be death (+) or recovery (-). The individuals were segmented according with pharmacology treatment in  
 405 dexamethasone-treatment and non-treatment with dexamethasone. Each circle indicates an individual  
 406 patient. Nonparametric *t* test (Mann-Whitney U test) was used to data not normally distributed. The  
 407 differences between the groups were presented with a *p* value in the graphics. (B) Venn diagram showed  
 408 all pharmacological treatment relations between dexamethasone, Oseltamivir, Piperacillin+Tazobactam,  
 409 Hydroxycloquine/cloroquine, Azitromycin/Ceftriaxone of different sets patients with COVID-19 in hospital  
 410 care. (C) Demonstrative percentages of patients in distinctive hospital and respiratory support during  
 411 hospitalization.

## 412 **DISCUSSION**

413 To date, the most significant predictors of COVID-19 disease severity are  
414 relate to either activation or suppression of the host immune response (44,45). In  
415 the present study, we show for the first time in a population of patients in the city  
416 of Ribeirão Preto - Brazil with COVID-19 that plasma sTREM-1 concentrations  
417 might be a predictive factor and a biomarker for disease severity. Plasma sTREM-  
418 1 concentrations were gradually increased from mild to moderate, severe and  
419 critical forms of COVID-19. Indeed, ROC analysis confirms that sTREM-1 was an  
420 important predictor of disease progression in COVID-19 patients.

421 TREM-1 exhibit the ability to amplify proinflammatory innate immune  
422 response, such as by the Toll like receptors (TLR), which recognize a wide range  
423 of bacterial, fungal and viral components (46). In addition to neutrophils,  
424 monocytes and macrophages, TREM-1 is also expressed in epithelial and  
425 endothelial cells (25). Elevated sTREM-1 level are indicative of acute and chronic  
426 conditions including sepsis and pneumonia (47,48). Enhanced inflammatory  
427 response in macrophages was indicated as a mechanism by which TREM-1  
428 signaling contributes to lung injury, suggesting that TREM-1 inhibition was a  
429 potential therapeutic target for neutrophilic lung inflammation and acute  
430 respiratory distress syndrome (ARDS) (49). Moreover, sTREM-1 level in sepsis  
431 could reflect an essential immune dysfunction, where excessive cleavage of  
432 TREM-1 could contribute to immunosuppression and death during a severe  
433 infection (50). Since severe infections can occur by multiple microorganism the  
434 broad prognostic of sTREM-1 implied its potential as a severity marker for all-  
435 cause febrile illness (51). However, fever was not the mostly common signs in  
436 admission patient with COVID-19 in our cohort, especially in mild and moderate  
437 disease. Thus, sTREM-1 has been recognized to be a valuable diagnostic and  
438 prognostic marker since it is easily detected using immunochemical assays.  
439 Nevertheless, the role of sTREM-1 in patients with COVID-19 remains unclear.

440 The number of COVID-19 patients is increasing dramatically worldwide and  
441 the early recognition of severe forms of COVID-19 is essential for timely triaging  
442 of patients. Some model analysis showed that IL-6 and CRP could be used as  
443 independent factors to predict the severity of COVID-19 (52). IL-6 is a

444 multifunctional cytokine that presented a strong proinflammatory effect with  
445 functions in inflammation, tumor, and hematological diseases (53,54). Other work  
446 suggested that the predictive values of IL-10 and IL-6 should be preferentially  
447 evaluated for early diagnosis of patients with severe disease (18). IL-10 is highly  
448 abundant, especially during the adaptive immune response (55). Although, some  
449 studies pointed that plasma IL-6 and IL-10 levels could be used as a factor to  
450 predict the progression of COVID-19, in our cohort these values alone did not  
451 distinguish the severe and critical groups, but these cytokines were in lower levels  
452 in mild/moderate disease and higher expression was observed in some patients  
453 with severe/critical COVID-19. Patients with severe COVID-19 disease presented  
454 with increased leukocytosis, neutrophilia, lymphopenia, and thrombocytopenia  
455 than those with non-severe disease (56); and we also demonstrated a significant  
456 correlation between plasma sTREM-1 and those hematological parameters in  
457 severe COVID-19.

458         Instead, sTREM-1 levels were found to be independent discriminators of  
459 disease severity on admission, we also comprised that sTREM-1 could be an  
460 outcome predictor for patients with COVID-19. Therefore, markedly elevated  
461 plasma sTREM-1 levels in patients with COVID-19 might be the indication of  
462 excessive inflammatory response and contribute to severe/critical illness or even  
463 death. Generally, the most common therapeutic options for viral infections are  
464 directed at either blocking viral replication or modulation of immune response.  
465 Dexamethasone exhibits broad-spectrum anti-inflammatory effects. In patients  
466 hospitalized with COVID-19, the use of dexamethasone resulted in lower  
467 mortality (57). We observed a longitudinal sTREM-1 detection in patient  
468 admission and outcome in hospital care; in patients with non-treatment with  
469 dexamethasone, sTREM-1 increased after admission and correlated with  
470 outcome death. However, patients that were treated with dexamethasone, in  
471 mostly the case, control and reduced the sTREM-1 production, but this  
472 phenomenon was not correlated with better recovery. It means a non-return point  
473 to anti-inflammatory treatment in COVID-19, and sTREM-1 value could expose  
474 that inflammatory status. It is likely that the beneficial effect of glucocorticoids in  
475 severe COVID-19 is subject on a selection of dose and time.

476 There are some limitations in our study. First, chronic diseases and  
477 secondary infection in some cases might exert effects on the increased plasma  
478 sTREM-1 level besides SARS-CoV-2 infection itself. Second, this study was  
479 limited by sample size. Larger studies with continuous monitoring of sTREM-1  
480 are necessary to further confirm the prognostic effect in patients with severe  
481 COVID-19. Exacerbation of the situation is usually a dynamic process; thus the  
482 data at a certain time point may not accurately reflect change in the patient  
483 condition. Third, some patients with critical illness were not admitted to intensive  
484 care unit, which definitely had a negative impact on the outcome of those patients.  
485 Although our findings should be evaluated with larger number of samples by  
486 multi-center research, sTREM-1 is a potential marker of diagnostic to distinguish  
487 critical COVID-19 and poor-outcome, and monitoring the sTREM-1 levels will  
488 improve treatment efficacy and reduce mortality.

## 489 **CONCLUSION**

490 In conclusion, our results suggested that admission plasma sTREM-1  
491 levels play an important role in discriminating disease severity and predicting  
492 adverse outcome in patients with COVID-19. Patients with markedly elevated  
493 admission sTREM-1 should be provided more attention and supported treatment.  
494 In this perspective, we suggested the sTREM-1 value contribution to the clinical  
495 course of COVID-19 infection and highlight potential strategies for therapeutic  
496 intervention. Also, emerged as a possible prognostic biomarker readily detected  
497 in plasma of COVID-19 patients.

## 498 **ACKNOWLEDGEMENTS**

499 The authors acknowledge the support of the ICU team of doctors, nurses,  
500 physiotherapists and the collaboration of *Hospital Santa Casa de Misericórdia of*  
501 *Ribeirão Preto* and *Hospital São Paulo of Ribeirão Preto*. The laboratory support  
502 from Supera Parque - Innovation and Technology Park- Ribeirão Preto/SP for  
503 testing infection by SARS-CoV-2 in healthy volunteers. The valuable contribution  
504 by Municipal Health Department of Ribeirão Preto city and Analysis Service  
505 Clinics (SAC) from Faculdade de Ciências Farmacêuticas de Ribeirão Preto –  
506 USP. We are grateful to Fabiana R. de Moraes for helping with Flow Cytometer

507 analysis; and Professors Victor Hugo Aquino Quintana and Márcia Regina von  
508 Zeska Kress for sharing viral BSL2 lab.

509 **Supplementary Data**

510 **Supplemental Table 1. Hospital support, supportive therapies and**  
511 **medications of patients severe and critical infected with SARS-CoV-2.**

512

| During hospital stay                           | Severe/critical<br>N=19 |
|------------------------------------------------|-------------------------|
| <b>Hospital support, No. (%)</b>               |                         |
| Infirmery                                      | 9 (47.36)               |
| Intensive care unit (ICU)                      | 10 (52.63)              |
| <b>Hospitalization data, No.</b>               |                         |
| Hospitalization days, median (IQR)             | 10 (8-22)               |
| Number of days since symptom onset (IQR)       | 6 (2-15)                |
| <b>Respiratory support received (%)</b>        |                         |
| Nasal-cannula oxygen                           | 5 (26.31)               |
| Non-rebreathing mask / Noninvasive ventilation | 8 (42.10)               |
| Invasive mechanical ventilation                | 6 (31.57)               |
| Oxygen Saturation median (IQR)                 | 93 (70-99)              |
| <b>Medications</b>                             |                         |
| Dexamethasone                                  | 14 (73.68)              |
| Azithromycin                                   | 14 (73.68)              |
| Ceftriaxone                                    | 13 (68.42)              |
| Oseltamivir                                    | 12 (63.15)              |
| Cloroquine/Hydroxychloroquine                  | 5 (26.31)               |
| Anticoagulant                                  | 1 (5.26)                |
| <b>Death</b>                                   | <b>17 (89.4)</b>        |

513

Abbreviation: IQR, interquartile range, Data are median (IQR), n (%), or n/N.

514 **Supplemental Table 2. Information about r and p-values of the correlation**  
515 **matrix of the graph shown in figure 2.**

| Comparison | Row         | Column      | Correlation | p-value  |
|------------|-------------|-------------|-------------|----------|
| 1          | sTREM1      | Lymphocytes | -0,52170    | 1,14E-06 |
| 2          | sTREM1      | Neutrophils | 0,58800     | 1,88E-08 |
| 3          | Lymphocytes | Neutrophils | -0,44264    | 5,55E-05 |
| 4          | sTREM1      | Glycemia    | 0,09286     | 0,42182  |
| 5          | Lymphocytes | Glycemia    | -0,36861    | 0,00097  |
| 6          | Neutrophils | Glycemia    | 0,09778     | 0,39753  |
| 7          | sTREM1      | IL10        | 0,42499     | 0,00012  |
| 8          | Lymphocytes | IL10        | -0,26048    | 0,02214  |
| 9          | Neutrophils | IL10        | 0,27028     | 0,01744  |
| 10         | Glycemia    | IL10        | 0,12544     | 0,27703  |
| 11         | sTREM1      | IL6         | 0,43267     | 8,50E-05 |



|    |             |          |          |          |
|----|-------------|----------|----------|----------|
| 12 | Lymphocytes | IL6      | -0,16860 | 0,14271  |
| 13 | Neutrophils | IL6      | 0,35654  | 0,00146  |
| 14 | Glycemia    | IL6      | -0,04650 | 0,68803  |
| 15 | IL10        | IL6      | 0,27826  | 0,01427  |
| 16 | sTREM1      | Mild     | -0,42227 | 0,00011  |
| 17 | Lymphocytes | Mild     | 0,64575  | 2,28E-10 |
| 18 | Neutrophils | Mild     | -0,34410 | 0,00218  |
| 19 | Glycemia    | Mild     | -0,26277 | 0,02095  |
| 20 | IL10        | Mild     | -0,17832 | 0,12075  |
| 21 | IL6         | Mild     | -0,14227 | 0,21709  |
| 22 | sTREM1      | Moderate | -0,26402 | 0,01871  |
| 23 | Lymphocytes | Moderate | 0,25992  | 0,02244  |
| 24 | Neutrophils | Moderate | -0,33536 | 0,00287  |
| 25 | Glycemia    | Moderate | -0,23557 | 0,03917  |
| 26 | IL10        | Moderate | -0,17433 | 0,12942  |
| 27 | IL6         | Moderate | -0,14347 | 0,21321  |
| 28 | Mild        | Moderate | -0,28445 | 0,01107  |
| 29 | sTREM1      | Severe   | -0,04560 | 0,69176  |
| 30 | Lymphocytes | Severe   | -0,40727 | 0,00026  |
| 31 | Neutrophils | Severe   | 0,17927  | 0,12125  |
| 32 | Glycemia    | Severe   | 0,52996  | 8,52E-07 |
| 33 | IL10        | Severe   | -0,02137 | 0,85461  |
| 34 | IL6         | Severe   | -0,03733 | 0,74885  |
| 35 | Mild        | Severe   | -0,35237 | 0,00156  |
| 36 | Moderate    | Severe   | -0,36560 | 0,00100  |
| 37 | sTREM1      | Critical | 0,68800  | 6,59E-12 |
| 38 | Lymphocytes | Critical | -0,44213 | 8,02E-05 |
| 39 | Neutrophils | Critical | 0,45144  | 5,41E-05 |
| 40 | Glycemia    | Critical | -0,05256 | 0,65648  |
| 41 | IL10        | Critical | 0,45644  | 4,36E-05 |
| 42 | IL6         | Critical | 0,37704  | 0,00093  |
| 43 | Mild        | Critical | -0,27454 | 0,01639  |
| 44 | Moderate    | Critical | -0,28493 | 0,01261  |
| 45 | Severe      | Critical | -0,33736 | 0,00288  |
| 46 | sTREM1      | Male     | 0,19819  | 0,08197  |
| 47 | Lymphocytes | Male     | -0,39743 | 0,00038  |
| 48 | Neutrophils | Male     | 0,15473  | 0,18202  |
| 49 | Glycemia    | Male     | 0,28389  | 0,01295  |
| 50 | IL10        | Male     | 0,15893  | 0,17027  |
| 51 | IL6         | Male     | -0,02913 | 0,80277  |
| 52 | Mild        | Male     | -0,21052 | 0,06431  |
| 53 | Moderate    | Male     | -0,17884 | 0,11721  |
| 54 | Severe      | Male     | 0,17882  | 0,11725  |

|    |             |                  |          |          |
|----|-------------|------------------|----------|----------|
| 55 | Critical    | Male             | 0,20958  | 0,06921  |
| 56 | sTREM1      | Age              | 0,43058  | 8,32E-05 |
| 57 | Lymphocytes | Age              | -0,64649 | 2,83E-10 |
| 58 | Neutrophils | Age              | 0,43821  | 7,52E-05 |
| 59 | Glycemia    | Age              | 0,33385  | 0,00321  |
| 60 | IL10        | Age              | 0,33105  | 0,00349  |
| 61 | IL6         | Age              | 0,27897  | 0,01467  |
| 62 | Mild        | Age              | -0,50132 | 2,94E-06 |
| 63 | Moderate    | Age              | -0,32776 | 0,00340  |
| 64 | Severe      | Age              | 0,41118  | 0,00020  |
| 65 | Critical    | Age              | 0,39176  | 0,00051  |
| 66 | Male        | Age              | 0,33291  | 0,00309  |
| 67 | sTREM1      | Systole          | 0,12566  | 0,27942  |
| 68 | Lymphocytes | Systole          | -0,10523 | 0,37222  |
| 69 | Neutrophils | Systole          | -0,03093 | 0,79362  |
| 70 | Glycemia    | Systole          | 0,12893  | 0,27360  |
| 71 | IL10        | Systole          | -0,11298 | 0,33785  |
| 72 | IL6         | Systole          | -0,05190 | 0,66054  |
| 73 | Mild        | Systole          | -0,03689 | 0,75175  |
| 74 | Moderate    | Systole          | -0,05579 | 0,63217  |
| 75 | Severe      | Systole          | -0,04354 | 0,70879  |
| 76 | Critical    | Systole          | 0,11156  | 0,34401  |
| 77 | Male        | Systole          | -0,02091 | 0,85768  |
| 78 | Age         | Systole          | 0,02243  | 0,84853  |
| 79 | sTREM1      | SaO <sub>2</sub> | 0,02523  | 0,82987  |
| 80 | Lymphocytes | SaO <sub>2</sub> | 0,25259  | 0,02991  |
| 81 | Neutrophils | SaO <sub>2</sub> | -0,07563 | 0,52189  |
| 82 | Glycemia    | SaO <sub>2</sub> | -0,03030 | 0,79774  |
| 83 | IL10        | SaO <sub>2</sub> | -0,02714 | 0,81847  |
| 84 | IL6         | SaO <sub>2</sub> | 0,03383  | 0,77480  |
| 85 | Mild        | SaO <sub>2</sub> | 0,17241  | 0,13911  |
| 86 | Moderate    | SaO <sub>2</sub> | 0,12471  | 0,28640  |
| 87 | Severe      | SaO <sub>2</sub> | -0,07139 | 0,54555  |
| 88 | Critical    | SaO <sub>2</sub> | -0,24686 | 0,03658  |
| 89 | Male        | SaO <sub>2</sub> | -0,11772 | 0,31784  |
| 90 | Age         | SaO <sub>2</sub> | -0,31813 | 0,00574  |
| 91 | Systole     | SaO <sub>2</sub> | 0,03868  | 0,74523  |

## 517 **NOTES**

### 518 *Author Contributions.*

519 PVSN, JCSC, CAS and conceptualization the study. PVSN, JCSC, VEP, NTN  
520 performed the main experimental procedure. MMP, supervised the collection of  
521 samples from patients. PVSN, JCSC, YCG, ACX, GSP, ICG, KZ, CT G, JGMA,  
522 AAFJ, help with samples collection. PVSN, JCSC, TFCFS, CMM, LCR, CFSLD,  
523 sample processed and fractionation. CNSO, YCG, TFCFS, CRBC, performed the  
524 main experimental cytokines measurement. SRM, analyzed the data by R  
525 program. PVSN, DMT, CAS, performed the statistical analysis of the data and  
526 wrote the article and prepared the figures. DPS, DCN, RCS, LFC, RCCB, APA,  
527 AMD, FMO, MRF, RSP, FCV, GGG, JJRR, OF, contributed to the collection of  
528 clinical specimens, demographic, helped clinical data management and clinical  
529 characteristics analysis from COVID-19 patients. PVSN, DMT, CAS, drafted the  
530 manuscript. All authors helped editing the manuscript. CAS and LHF supervised  
531 the project. FGF, VLDB, CRBC and LHF, provided study materials, reagents and  
532 other analysis tools and equipment. CAS, FGF, SRCM, EMSR, ALV, APMF,  
533 IKFMS, VLDB, CRBC, MDB, AM, RTS, LHF, coordination and idealization of the  
534 project; and critical revision of the manuscript for important intellectual concept.  
535 All authors have read and agreed to the published version of the manuscript.

### 536 *Financial support.*

537 This work was supported by Fundação de Amparo à Pesquisa do Estado de São  
538 Paulo – FAPESP (grants n. 2014/07125-6, 2020/05207-6 for LHF and grant n.  
539 2020/05270-0 for VDB); Fundação de apoio à Universidade de São Paulo –FUSP  
540 by USP VIDA program. Coordenação de Aperfeiçoamento de Pessoal de Nível  
541 Superior (CAPES - Finance Code 001); Fundação de Amparo à Pesquisa do  
542 Estado do Amazonas - FAPEAM and from Conselho Nacional de  
543 Desenvolvimento Científico e Tecnológico (CNPq). RTS is funded by NIH (R01  
544 HL144478 ) and Department of Veterans Affairs ( I01 BX001786).

### 545 *Conflict of interest statement*

546 The authors declare that the research was conducted in the absence of any  
547 commercial or financial relationships that could be construed as a potential  
548 conflict of interest.

## 549 REFERENCES

- 550 1. Zhou P, Yang X Lou, Wang XG, Hu B, Zhang L, Zhang W, et al. A  
551 pneumonia outbreak associated with a new coronavirus of probable bat  
552 origin. *Nature*. 2020;579(7798):270–273.
- 553 2. Velavan TP, Meyer CG. The COVID-19 epidemic. *Trop Med Int Heal*.  
554 2020;25(3):278–80.
- 555 3. Zhang Y-Z. Novel 2019 coronavirus genome. Shanghai Public Health  
556 Clinical Center & School of Public Health. 2020.
- 557 4. Andersen KG, Rambaut A, Lipkin WI, Holmes EC, Garry RF. The  
558 proximal origin of SARS-CoV-2. *Nat Med*. 2020;26(April):450–2.
- 559 5. Ministério da Saúde. Protocolo de Manejo Clínico para o Novo  
560 Coronavírus (2019-nCoV). 2020. p. 1 ed.
- 561 6. Dan Xu M, Fuling Zhou M, Wenbo Sun M, Liangjun Chen M, Lan Lan M,  
562 Huan Li M, et al. Relationship Between serum SARS-CoV-2 nucleic  
563 acid(RNAemia) and Organ Damage in COVID-19 Patients: A Cohort  
564 Study. *Clin Infect Dis*. 2020;
- 565 7. Becker RC. COVID-19 update: Covid-19-associated coagulopathy. *J*  
566 *Thromb Thrombolysis* [Internet]. 2020;50(1):54–67. Available from:  
567 <https://doi.org/10.1007/s11239-020-02134-3>
- 568 8. Connors JM, Levy JH. COVID-19 and its implications for thrombosis and  
569 anticoagulation. *Blood*. 2020;135(23):2033–40.
- 570 9. Dupont V, Kanagaratnam L, Goury A, Poitevin G, Bard M, Julien G, et al.  
571 Excess soluble fms-like tyrosine kinase 1 correlates with endothelial  
572 dysfunction and organ failure in critically ill COVID-19 patients. *Clin Infect*  
573 *Dis*. 2020;
- 574 10. Huang C, Wang Y, Li X, Ren L, Zhao J, Hu Y, et al. Clinical features of  
575 patients infected with 2019 novel coronavirus in Wuhan, China. *Lancet*.  
576 2020;395(10223):497–506.
- 577 11. Chen G, Wu D, Guo W, Cao Y, Huang D, Wang H, et al. Clinical and  
578 immunological features of severe and moderate coronavirus disease  
579 2019. *J Clin Invest*. 2020;130(5):2620–9.
- 580 12. Wu Z, McGoogan JM. Characteristics of and Important Lessons From the  
581 Coronavirus Disease 2019 (COVID-19) Outbreak in China. *JAMA*.  
582 2020;323(13):1239–42.
- 583 13. Lighter J, Phillips M, Hochman S, Sterling S, Johnson D, Francois F, et al.  
584 Obesity in Patients Younger Than 60 Years Is a Risk Factor for COVID-  
585 19 Hospital Admission. *Clin Infect Dis*. 2020;71(15):896–897.
- 586 14. Henry B, de Oliveira M, Benoit S, Plebani M L. Hematologic, biochemical  
587 and immune biomarker abnormalities associated with severe illness and  
588 mortality in coronavirus disease 2019 (COVID-19): a meta-analysis. *Clin*  
589 *Chem Lab Med*. 2020;58(7):1021–8.

- 590 15. Tay MZ, Poh CM, Rénia L, MacAry PA, Ng LFP. The trinity of COVID-19:  
591 immunity, inflammation and intervention. *Nat Rev Immunol* [Internet].  
592 2020;20(6):363–74. Available from: [http://dx.doi.org/10.1038/s41577-020-](http://dx.doi.org/10.1038/s41577-020-0311-8)  
593 0311-8
- 594 16. Qin C, Zhou L, Hu Z, Zhang S, Yang S, Tao Y, et al. Dysregulation of  
595 immune response in patients with COVID-19 in Wuhan, China. *Clin Infect*  
596 *Dis*. 2020;71(15):762–768.
- 597 17. Chen L, Liu HG, Liu W, Liu J, Liu K, Shang J, et al. [Analysis of clinical  
598 features of 29 patients with 2019 novel coronavirus pneumonia].  
599 *Zhonghua Jie He He Hu Xi Za Zhi*. 2020;
- 600 18. Han H, Ma Q, Li C, Liu R, Zhao L, Wang W, et al. Profiling serum  
601 cytokines in COVID-19 patients reveals IL-6 and IL-10 are disease  
602 severity predictors. *Emerg Microbes Infect*. 2020;9(1):1123–30.
- 603 19. Wang G, Wu C, Zhang Q, Wu F, Yu B, Lv J, et al. C-reactive protein level  
604 may predict the risk of COVID-19 aggravation. *Open Forum Infect Dis*.  
605 2020;7(5):1–5.
- 606 20. Xiaomin Luo M, Wei Zhou M, Xiaojie Yan M, Tangxi Guo M, Benchao  
607 Wang, MD Hongxia Xia M, Lu Ye M, et al. Prognostic value of C-reactive  
608 protein in patients with COVID-19. *Clin Infect Dis* [Internet].  
609 2020;23(ciaa641). Available from: [10.1093/cid/ciaa641](https://doi.org/10.1093/cid/ciaa641)
- 610 21. Yao Y, Cao J, Wang Q, Shi Q, Liu K, Luo Z, et al. D-dimer as a biomarker  
611 for disease severity and mortality in COVID-19 patients: A case control  
612 study. *J Intensive Care*. 2020;8(49).
- 613 22. Takeuchi O, Akira S. Innate immunity to virus infection. *Immunol Rev*.  
614 2009;227(1):75–86.
- 615 23. Adukpo S, Gyan BA, Ofori MF, Dodoo D, Velavan TP, Meyer CG.  
616 Triggering receptor expressed on myeloid cells 1 (TREM-1) and cytokine  
617 gene variants in complicated and uncomplicated malaria. *Trop Med Int*  
618 *Heal*. 2016;21(12):1592–601.
- 619 24. Ford JW, McVicar DW. TREM and TREM-like receptors in inflammation  
620 and disease. *Current Opinion in Immunology*. 2009.
- 621 25. Chen LC, Laskin JD, Gordon MK, Laskin DL. Regulation of TREM  
622 expression in hepatic macrophages and endothelial cells during acute  
623 endotoxemia. *Exp Mol Pathol*. 2008;
- 624 26. Hommes TJ, Dessing MC, van 't Veer C, Florquin S, Colonna M, de Vos  
625 AF, et al. TREM-1/3 Contribute to Protective Immunity in Klebsiella  
626 Derived Pneumosepsis Whereas TREM-2 Does Not. *Am J Respir Cell*  
627 *Mol Biol*. 2015;
- 628 27. de Oliveira Matos A, Dantas P, Silva-Sales M, Sales-Campos H. The role  
629 of the triggering receptor expressed on myeloid cells-1 (TREM-1) in non-  
630 bacterial infections. *Crit Rev Microbiol* [Internet]. 2020;46(3):237–52.  
631 Available from: <https://doi.org/10.1080/1040841X.2020.1751060>

- 632 28. Dantas PH dos S, Matos A de O, da Silva Filho E, Silva-Sales M, Sales-  
633 Campos H. Triggering receptor expressed on myeloid cells-1 (TREM-1)  
634 as a therapeutic target in infectious and noninfectious disease: a critical  
635 review. *Int Rev Immunol* [Internet]. 2020;0(0):1–15. Available from:  
636 <https://doi.org/10.1080/08830185.2020.1762597>
- 637 29. Arts R, Joosten L, van der Meer J, Netea M. TREM-1: intracellular  
638 signaling pathways and interaction with pattern recognition receptors. *J*  
639 *Leukoc Biol*. 2013;93(2):209–15.
- 640 30. Weber B, Schuster S, Zysset D, Rihs S, Dickgreber N, Schürch C, et al.  
641 TREM-1 Deficiency Can Attenuate Disease Severity without Affecting  
642 Pathogen Clearance. *PLoS Pathog*. 2014;10(1):e1003900.
- 643 31. Yuan Z, Petree JR, Lee FEH, Fan X, Salaita K, Guidot DM, et al.  
644 Macrophages exposed to HIV viral protein disrupt lung epithelial cell  
645 integrity and mitochondrial bioenergetics via exosomal microRNA  
646 shuttling. *Cell Death Dis*. 2019;10(8):580.
- 647 32. Tamaro A, Derive M, Gibot S, Leemans JC, Florquin S, Dessing MC.  
648 TREM-1 and its potential ligands in non-infectious diseases: from biology  
649 to clinical perspectives. *Pharmacol Ther* [Internet]. 2017;177:81–95.  
650 Available from: <http://dx.doi.org/10.1016/j.pharmthera.2017.02.043>
- 651 33. Cao C, Gu J, Zhang J. Soluble triggering receptor expressed on myeloid  
652 cell-1 (sTREM-1): a potential biomarker for the diagnosis of infectious  
653 diseases. *Front Med*. 2017;11(2):169–77.
- 654 34. Kuemmel A, Alflen A, Schmidt LH, Sebastian M, Wiewrodt R, Schulze AB,  
655 et al. Soluble Triggering Receptor Expressed on Myeloid Cells 1 in lung  
656 cancer. *Sci Rep*. 2018;8(10766):1–9.
- 657 35. Klesney-Tait J, Turnbull IR, Colonna M. The TREM receptor family and  
658 signal integration. *Nat Immunol*. 2006;7:1266–1273.
- 659 36. Gómez-piña V, Soares-schanoski A, Rodríguez-rojas A, Fresno C, García  
660 F, Vallejo-cremades MT, et al. Metalloproteinases Shed TREM-1  
661 Ectodomain from Lipopolysaccharide-stimulated Human Monocytes. *J*  
662 *Immunol* [Internet]. 2007;179:4065–73. Available from:  
663 <http://www.jimmunol.org/content/179/6/4065.long>
- 664 37. Li Z, Zhang E, Hu Y, Liu Y, Chen B. High Serum sTREM-1 Correlates  
665 With Myocardial Dysfunction and Predicts Prognosis in Septic Patients.  
666 *Am J Med Sci*. 2016;351(6):555–62.
- 667 38. Jedynak M, Siemiatkowski A, Mroczko B, Groblewska M, Milewski R,  
668 Szmitkowski M. Soluble TREM-1 Serum Level can Early Predict Mortality  
669 of Patients with Sepsis, Severe Sepsis and Septic Shock. *Arch Immunol*  
670 *Ther Exp (Warsz)*. 2018;66:299–306.
- 671 39. Huang CT, Lee LN, Ho CC, Shu CC, Ruan SY, Tsai YJ, et al. High serum  
672 levels of procalcitonin and soluble TREM-1 correlated with poor prognosis  
673 in pulmonary tuberculosis. *J Infect*. 2014;68(5):440–7.
- 674 40. Guideline C. Diagnosis and treatment protocol for novel coronavirus



- 675 pneumonia (Trial version 7). *Chin Med J (Engl)*. 2020;133(9):1087–95.
- 676 41. Wan S, Xiang Y, Fang W, Zheng Y, Li B, Hu Y, et al. Clinical features and  
677 treatment of COVID-19 patients in northeast Chongqing. *J Med Virol*.  
678 2020;0–1.
- 679 42. Wei T, Simko V, Levy M, Xie Y, Jin Y, Zemla J. Package ‘corrplot.’  
680 *Statisticians*. 2017;56(316):e24.
- 681 43. Harrell FE. With contributions from Charles Dupont and many others  
682 (2017). “Hmisc: Harrell Miscellaneous”. R package version 4.0-1. 2020. p.  
683 1–433.
- 684 44. Yang P, Ding Y, Xu Z, Pu R, Li P, Yan J, et al. Epidemiological and  
685 clinical features of COVID-19 patients with and without pneumonia in  
686 Beijing, China. *Medrxiv*. 2020;
- 687 45. Zumla A, Hui DS, Azhar EI, Memish ZA, Maeurer M. Reducing mortality  
688 from 2019-nCoV: host-directed therapies should be an option. *Lancet*.  
689 2020;395(10224):e35–e36.
- 690 46. Zheng H, Heiderscheidt CA, Joo M, Gao X, Knezevic N, Mehta D, et al.  
691 MYD88-dependent and -independent activation of TREM-1 via specific  
692 TLR ligands. *Eur J Immunol*. 2010;40(1):162–71.
- 693 47. Dimopoulou I, Pelekanou A, Mavrou I, Savva A, Tzanela M, Kotsaki A, et  
694 al. Early serum levels of soluble triggering receptor expressed on myeloid  
695 cells-1 in septic patients: Correlation with monocyte gene expression. *J*  
696 *Crit Care*. 2012;27(3):294–300.
- 697 48. Gibot S, Cravoisy A, Levy B, Bene MC, Faure G, Bollaert PE. Soluble  
698 Triggering Receptor Expressed on Myeloid Cells and the Diagnosis of  
699 Pneumonia. *N Engl J Med*. 2004;350:451–8.
- 700 49. Yuan Z, Syed M, Panchal D, Joo M, Bedi C, Lim S, et al. TREM-1-  
701 accentuated lung injury via miR-155 is inhibited by LP17 nanomedicine.  
702 *Am J Physiol - Lung Cell Mol Physiol*. 2016;310(5):L426-38.
- 703 50. Hotchkiss RS, Monneret G, Payen D. Immunosuppression in sepsis: A  
704 novel understanding of the disorder and a new therapeutic approach.  
705 *Lancet Infect Dis*. 2013;13(3):260–8.
- 706 51. Richard-Greenblatt M, Boillat-Blanco N, Zhong K, Mbarack Z, Samaka J,  
707 Mlaganile T, et al. Prognostic Accuracy of Soluble Triggering Receptor  
708 Expressed on Myeloid Cells (sTREM-1)-based Algorithms in Febrile  
709 Adults Presenting to Tanzanian Outpatient Clinics. *Clin Infect Dis*.  
710 2020;70(7):1304–1312.
- 711 52. Liu F, Li L, Xu M Da, Wu J, Luo D, Zhu YS, et al. Prognostic value of  
712 interleukin-6, C-reactive protein, and procalcitonin in patients with COVID-  
713 19. *J Clin Virol*. 2020;127:104370.
- 714 53. Taniguchi K, Karin M. IL-6 and related cytokines as the critical lynchpins  
715 between inflammation and cancer. *Semin Immunol*. 2014;26:54–74.
- 716 54. Lai HS, Lin WH, Lai SL, Lin HY, Hsu WM, Chou CH, et al. Interleukin-6

- 717 Mediates Angiotensinogen Gene Expression during Liver Regeneration.  
718 PLoS One. 2013;e67868.
- 719 55. McKinstry KK, Strutt TM, Buck A, Curtis JD, Dibble JP, Huston G, et al.  
720 IL-10 Deficiency Unleashes an Influenza-Specific Th17 Response and  
721 Enhances Survival against High-Dose Challenge. J Immunol.  
722 2009;182(12):7353–7363.
- 723 56. Vardhana SA, Wolchok JD. The many faces of the anti-COVID immune  
724 response. J Exp Med. 2020;217(6):e20200678.
- 725 57. The RECOVERY Collaborative G. Dexamethasone in Hospitalized  
726 Patients with Covid-19 — Preliminary Report. N Engl J Med. 2020;  
727
